# Supplementary material
Source: MDPI journal article supplement (https://www.mdpi.com/2071-1050/7/12/15788)
Supplement: s1 [file s1]

## Section 1: Consent to participate

*The aim of this section is to get your informed consent to take part in this survey. You will not be able to continue with the survey if this box is not ticked.*

1. I hereby consent to voluntarily participate in this survey

☐ Yes

## Section 2: Project details

*Throughout this questionnaire, the word "project" will be used to refer to both single-site projects and larger programmes which may or may not have smaller sub-programmes or projects falling within them.*

1. What is the name of the restoration project you are involved in? If you are involved in many projects please only name one and answer the rest of the questions based on your involvement in this chosen project.

2. What is the name of the sub-project you are involved in, if applicable?

3. Please select a category that best describes your project from the list below.

- ☐ I do not know
- ☐ Erosion control
- ☐ Ecological restoration
- ☐ Restoration of natural capital

- ☐ Rehabilitation
- ☐ Reclamation
- ☐ Remediation
- ☐ Revegetation

Other (please specify)

#### 4. Please select from the list below elements that are applicable to your project

- ☐ Ecological principles are followed
- ☐ Indigenous species are used
- ☐ Attention is paid to ecosystem structure
- ☐ Attention is paid to ecosystem function and processes
- ☐ Local ecological conditions and pre-disturbance conditions are considered and included as part of the design plan
- ☐ Due regard is given to both society and nature, and the interactions between them
- ☐ Long-term sustainability of the "restored" system is ensured
- ☐ Potential threats to the integrity of the "restored" system are minimised

#### 5. Who funds the project?

- ☐ Government
- ☐ Private funder(s)
- ☐ Mining company
- ☐ Non-governmental organisation

☒ I do not know

Other (please specify)

6. What is the age of the project (age in years)?

☒ <2

☐ 2-5

☐ 6-10

☐ >10

7. What is your primary role in the project you named in question 1?

☒ Coordinator/facilitator

☐ Implementer/practitioner

☐ Researcher

☐ Other (please specify)

8. What is your other role in your chosen project?

☐ Coordinator/facilitator

☐ Implementer/practitioner

☐ Researcher

☐ No other role

☐ Other (please specify)

### Section 3: Baseline information collection

Please answer the questions in the following sections as they apply to the restoration project you are involved in.

1. Is baseline socio-economic information collected prior to restoration?

- ☐ Yes
- ☐ No
- ☐ I do not know

2. If you answered yes above, please rate the adequacy of socio-economic baseline information collection, for those indicators applicable to your project.

|                                | Very inadequate          | Inadequate               | I do not know            | Adequate                 | Very adequate            |
|--------------------------------|--------------------------|--------------------------|--------------------------|--------------------------|--------------------------|
| Environmental awareness levels | <input type="checkbox"/> |
| Unemployment rate              | <input type="checkbox"/> |
| People living in poverty       | <input type="checkbox"/> |
| Household income               | <input type="checkbox"/> |
| Literacy                       | <input type="checkbox"/> |
| Other 1                        | <input type="checkbox"/> |
| Other 2                        | <input type="checkbox"/> |
| Other 3                        | <input type="checkbox"/> |

If other(s), please specify

3. If you chose "very inadequate" and/or "inadequate" above, what are the reasons for the inadequacy?

- ☐ I do not know
- ☐ Lack of expertise
- ☐ Lack of funds
- ☐ Lack of time
- ☐ Baseline information collection is not considered necessary
- ☐ Baseline information collection is not part of the project design and/or terms of reference
- ☐ Other (please specify)

4. Is baseline ecological information collected prior to restoration?

- ☐ Yes
- ☐ No
- ☐ I do not know

5. If you answered yes above, please rate the adequacy of ecological baseline information collection, for those indicators applicable to your project.

|                                     | Very inadequate          | Inadequate               | I do not know            | Adequate                 | Very adequate            |
|-------------------------------------|--------------------------|--------------------------|--------------------------|--------------------------|--------------------------|
| Plant species composition           | <input type="checkbox"/> |
| Density/cover of indigenous species | <input type="checkbox"/> |
| Density/cover of alien species      | <input type="checkbox"/> |
| Water quality                       | <input type="checkbox"/> |

|                            |                          |                          |                          |                          |                          |                          |                          |
|----------------------------|--------------------------|--------------------------|--------------------------|--------------------------|--------------------------|--------------------------|--------------------------|
| Water quantity             | <input type="checkbox"/> |
| Aquatic diversity          | <input type="checkbox"/> |
| Above-ground carbon stocks | <input type="checkbox"/> |
| Below-ground carbon stocks | <input type="checkbox"/> |
| Soil chemical quality      | <input type="checkbox"/> |
| Geomorphology              | <input type="checkbox"/> |
| Erosion/bare patches       | <input type="checkbox"/> |
| Levels of degradation      | <input type="checkbox"/> |
| Other 1                    | <input type="checkbox"/> |
| Other 2                    | <input type="checkbox"/> |

If other(s), please specify

6. If you chose "very inadequate" and/or "inadequate" above, what are the reasons for the inadequacy?

- ☐ Lack of expertise
- ☐ Lack of funds
- ☐ Lack of time
- ☐ Baseline information collection is not considered necessary
- ☐ Baseline information collection is not part of the project design and/or terms of reference
- ☐ Other (please specify)

7. Please indicate the extent to which you agree with the following statement: a variety of incentives for collection and disincentives for the lack of collection would increase the incidence and adequacy of baseline information collection.

|                    | Strongly disagree     | Disagree              | No opinion            | Agree                 | Strongly agree        |
|--------------------|-----------------------|-----------------------|-----------------------|-----------------------|-----------------------|
| Level of agreement | <input type="radio"/> |

8. What else could be done to increase the incidence and adequacy of baseline information collection?

#### Section 4: Goals of restoration

1. Does your project have socio-economic goals?

- ☐ Yes
- ☐ No
- ☐ I do not know

2. If you answered yes above, what are the socio-economic goals of your chosen restoration project? Please also indicate whether they are stated in writing and/or quantified.

| Goal                   | Stated in writing    | Quantified numerically |
|------------------------|----------------------|------------------------|
| Job creation           | <input type="text"/> | <input type="text"/>   |
| Poverty alleviation    | <input type="text"/> | <input type="text"/>   |
| Livelihood improvement | <input type="text"/> | <input type="text"/>   |

|                                                  |                      |                      |                      |
|--------------------------------------------------|----------------------|----------------------|----------------------|
| Development of a market for PES                  | <input type="text"/> | <input type="text"/> | <input type="text"/> |
| Capacity building                                | <input type="text"/> | <input type="text"/> | <input type="text"/> |
| Environmental awareness creation                 | <input type="text"/> | <input type="text"/> | <input type="text"/> |
| Other 1                                          | <input type="text"/> | <input type="text"/> | <input type="text"/> |
| Other 2                                          | <input type="text"/> | <input type="text"/> | <input type="text"/> |
| If other(s), please specify <input type="text"/> |                      |                      |                      |

3. If you answered no or sometimes to the question whether any of the socio-economic goals are stated in writing and/or quantified, what are the reasons?

- ☐ I do not know
- ☐ Stakeholders are vague about what they want
- ☐ It is not considered necessary to specify and quantify goals
- ☐ Not all goals can be quantified
- ☐ Goals change all the time
- ☐ Other (please specify)



4. Does your project have ecological goals?

- ☐ Yes
- ☐ No
- ☐ I do not know

5. If you answered yes above, what are the ecological goals of your chosen restoration project? Please indicate whether each goal is stated in writing and/or quantified.

|                                    | Goal                 | Stated in writing    | Quantified numerically |
|------------------------------------|----------------------|----------------------|------------------------|
| I do not know                      | <input type="text"/> | <input type="text"/> | <input type="text"/>   |
| Alien plant control                | <input type="text"/> | <input type="text"/> | <input type="text"/>   |
| Water resource improvement         | <input type="text"/> | <input type="text"/> | <input type="text"/>   |
| Biodiversity conservation          | <input type="text"/> | <input type="text"/> | <input type="text"/>   |
| Soil conservation                  | <input type="text"/> | <input type="text"/> | <input type="text"/>   |
| Carbon sequestration               | <input type="text"/> | <input type="text"/> | <input type="text"/>   |
| Ecosystem productivity improvement | <input type="text"/> | <input type="text"/> | <input type="text"/>   |
| Restoring natural capital          | <input type="text"/> | <input type="text"/> | <input type="text"/>   |
| Increasing resilience              | <input type="text"/> | <input type="text"/> | <input type="text"/>   |
| Other 1                            | <input type="text"/> | <input type="text"/> | <input type="text"/>   |
| Other 2                            | <input type="text"/> | <input type="text"/> | <input type="text"/>   |

If other(s), please specify

6. If you answered no or sometimes to the question whether any of the ecological goals are stated in writing and/or quantified, what are the reasons?

- ☐ I do not know
- ☐ Stakeholders are vague about what they want
- ☐ It is not considered necessary to specify and quantify goals
- ☐ Not all goals can be quantified
- ☐ Goals change all the time
- ☐ Other (please specify)

7. Please indicate the extent to which you agree with this statement: it is better to set quantitative goals than qualitative ones, for ease of measurement.

|                    | Strongly disagree     | Disagree              | No opinion            | Agree                 | Strongly agree        |
|--------------------|-----------------------|-----------------------|-----------------------|-----------------------|-----------------------|
| Level of agreement | <input type="radio"/> |

8. Any comments pertaining to the setting of restoration goals?

## Section 5: Monitoring

### 1. Is monitoring mandatory?

- ☐ Yes
- ☐ No
- ☐ Sometimes
- ☐ I do not know

Please elaborate

### 2. Is monitoring done?

- ☐ Yes
- ☐ No
- ☐ Sometimes
- ☐ I do not know

### 3. If you answered no or sometimes in question 2 above, what are the reasons for the lack of, or inconsistent monitoring?

- ☐ I do not know
- ☐ Lack of capacity
- ☐ Lack of knowledge
- ☐ Lack of financial resources
- ☐ It is not considered necessary to monitor

- ☐ Monitoring is not part of the project design or terms of reference
- ☐ Other (please specify) \_\_\_\_\_

[illegible]

4. If you answered yes or sometimes in question 2, what indicators are monitored, at what temporal and spatial scales, and who does the monitoring?

|                                | Indicator monitored? | Frequency            | Spatial scale        | By who               |
|--------------------------------|----------------------|----------------------|----------------------|----------------------|
| I do not know                  | <input type="text"/> | <input type="text"/> | <input type="text"/> | <input type="text"/> |
| Person hours worked            | <input type="text"/> | <input type="text"/> | <input type="text"/> | <input type="text"/> |
| Training provided              | <input type="text"/> | <input type="text"/> | <input type="text"/> | <input type="text"/> |
| Awareness campaigns held       | <input type="text"/> | <input type="text"/> | <input type="text"/> | <input type="text"/> |
| Number of jobs created         | <input type="text"/> | <input type="text"/> | <input type="text"/> | <input type="text"/> |
| Livelihood impacts             | <input type="text"/> | <input type="text"/> | <input type="text"/> | <input type="text"/> |
| Environmental awareness levels | <input type="text"/> | <input type="text"/> | <input type="text"/> | <input type="text"/> |
| Area cleared of                | <input type="text"/> | <input type="text"/> | <input type="text"/> | <input type="text"/> |

|                                                  |                      |                      |                      |                      |
|--------------------------------------------------|----------------------|----------------------|----------------------|----------------------|
| invasives                                        |                      |                      |                      |                      |
| Fences erected                                   | <input type="text"/> | <input type="text"/> | <input type="text"/> | <input type="text"/> |
| Solid structures built                           | <input type="text"/> | <input type="text"/> | <input type="text"/> | <input type="text"/> |
| Area revegetated                                 | <input type="text"/> | <input type="text"/> | <input type="text"/> | <input type="text"/> |
| Water quantity                                   | <input type="text"/> | <input type="text"/> | <input type="text"/> | <input type="text"/> |
| Water quality                                    | <input type="text"/> | <input type="text"/> | <input type="text"/> | <input type="text"/> |
| Species richness                                 | <input type="text"/> | <input type="text"/> | <input type="text"/> | <input type="text"/> |
| Soil erodability                                 | <input type="text"/> | <input type="text"/> | <input type="text"/> | <input type="text"/> |
| Carbon sequestered                               | <input type="text"/> | <input type="text"/> | <input type="text"/> | <input type="text"/> |
| Plant survival/growth                            | <input type="text"/> | <input type="text"/> | <input type="text"/> | <input type="text"/> |
| Biomass accumulation                             | <input type="text"/> | <input type="text"/> | <input type="text"/> | <input type="text"/> |
| Other 1                                          | <input type="text"/> | <input type="text"/> | <input type="text"/> | <input type="text"/> |
| Other 2                                          | <input type="text"/> | <input type="text"/> | <input type="text"/> | <input type="text"/> |
| Other 3                                          | <input type="text"/> | <input type="text"/> | <input type="text"/> | <input type="text"/> |
| If other(s), please specify <input type="text"/> |                      |                      |                      |                      |

5. Please indicate the extent to which you agree with this statement: allocation of adequate funds and other necessary resources for monitoring should be compulsory when designing a restoration project.

|                    | Strongly disagree     | Disagree              | No opinion            | Agree                 | Strongly agree        |
|--------------------|-----------------------|-----------------------|-----------------------|-----------------------|-----------------------|
| Level of agreement | <input type="radio"/> |

6. Please comment on what could be done to increase the incidence of long-term monitoring.

## 6. Information sharing

1. Is information pertaining to your project and its impacts shared with other parties?

- ☒ Yes
- ☐ No
- ☐ I do not know

2. If you answered yes above, information pertaining to your project and its impacts is shared by means of (tick all that apply):

- ☐ I do not know
- ☐ Website postings
- ☐ Periodic organisation reports and newsletters
- ☐ Presentations at conferences
- ☐ Popular articles
- ☐ Awareness campaigns

- ☐ Media releases
- ☐ Articles in refereed journals
- ☐ Other (please specify)

3. Does your project experience failures (instances where goals are not achieved)?

- ☐ Yes
- ☐ No
- ☐ I do not know

4. If you answered yes above, are the failures publicised?

- ☐ Yes
- ☐ No
- ☐ I do not know

5. How likely are you to use an information sharing platform (e.g. an electronic portal) to disseminate information about your project and to learn about other projects?

|            | Highly unlikely          | Unlikely                 | I do not know            | Likely                   | Highly likely            |
|------------|--------------------------|--------------------------|--------------------------|--------------------------|--------------------------|
| Likelihood | <input type="checkbox"/> |

6. What would limit your use of such an information sharing platform?

- ☐ Organisation's privacy policy

- ☐ Lack of interest
- ☐ Time constraints
- ☐ Funding constraints
- ☐ Other (please specify)

## Section 7: Correspondent contact information

*1. Please provide your name and contact information. This information will not be used in any analysis and is only required for record keeping purposes.*

Name:

Company/organisation:

Email Address:

Phone Number:
